# Supplementary material for: Impact of the 2015 Middle East Respiratory Syndrome Outbreak on Emergency Care Utilization and Mortality in South Korea
Source: PubMed Central journal article supplement — Yonsei Med J. 2019 Jul 19;60(8):796–803. doi: 10.3349/ymj.2019.60.8.796 (PMC6660446; doi:10.3349/ymj.2019.60.8.796), 2019-07-19
Supplement: ymj-60-796-s002.pdf [file ymj-60-796-s002.pdf]

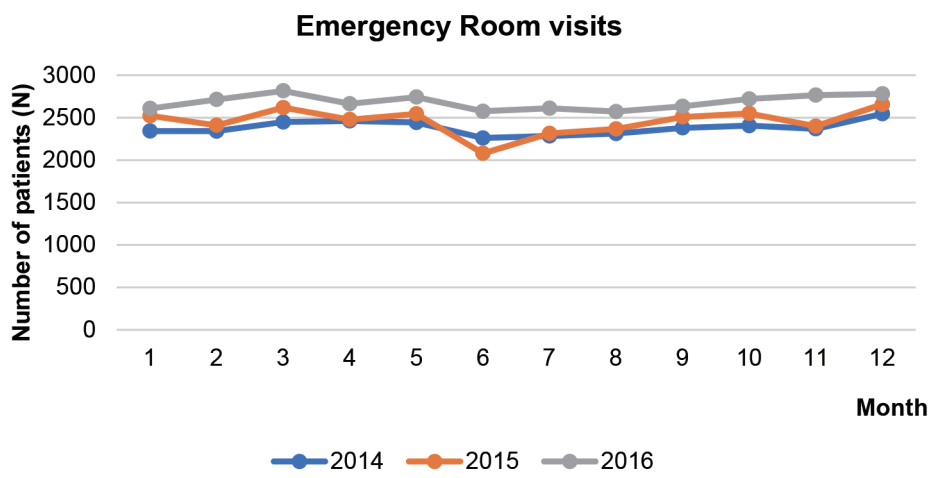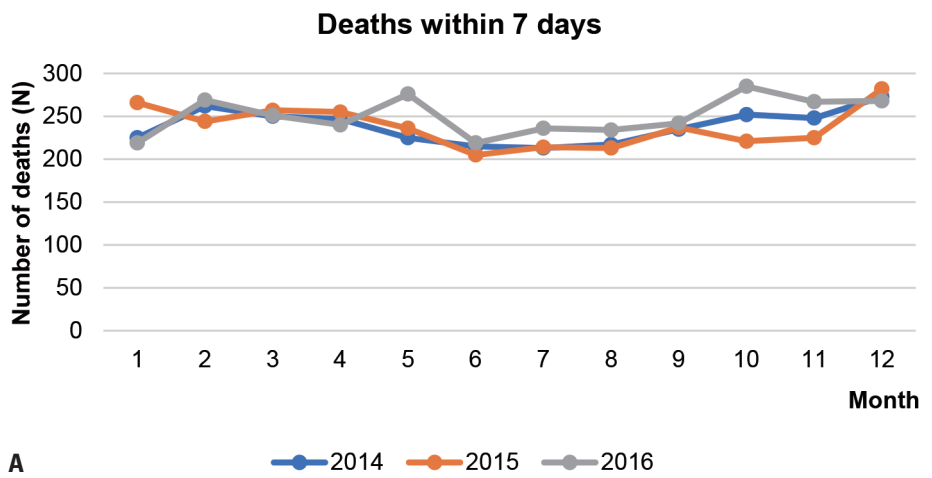

**A**      ● 2014    ● 2015    ● 2016

**Supplementary Fig. 2.** Trends in emergency room visits and deaths within 7 days between 2014 and 2016 according to the diseases. (A) Monthly number of emergency room visits and deaths within 7 days of myocardial infarction.

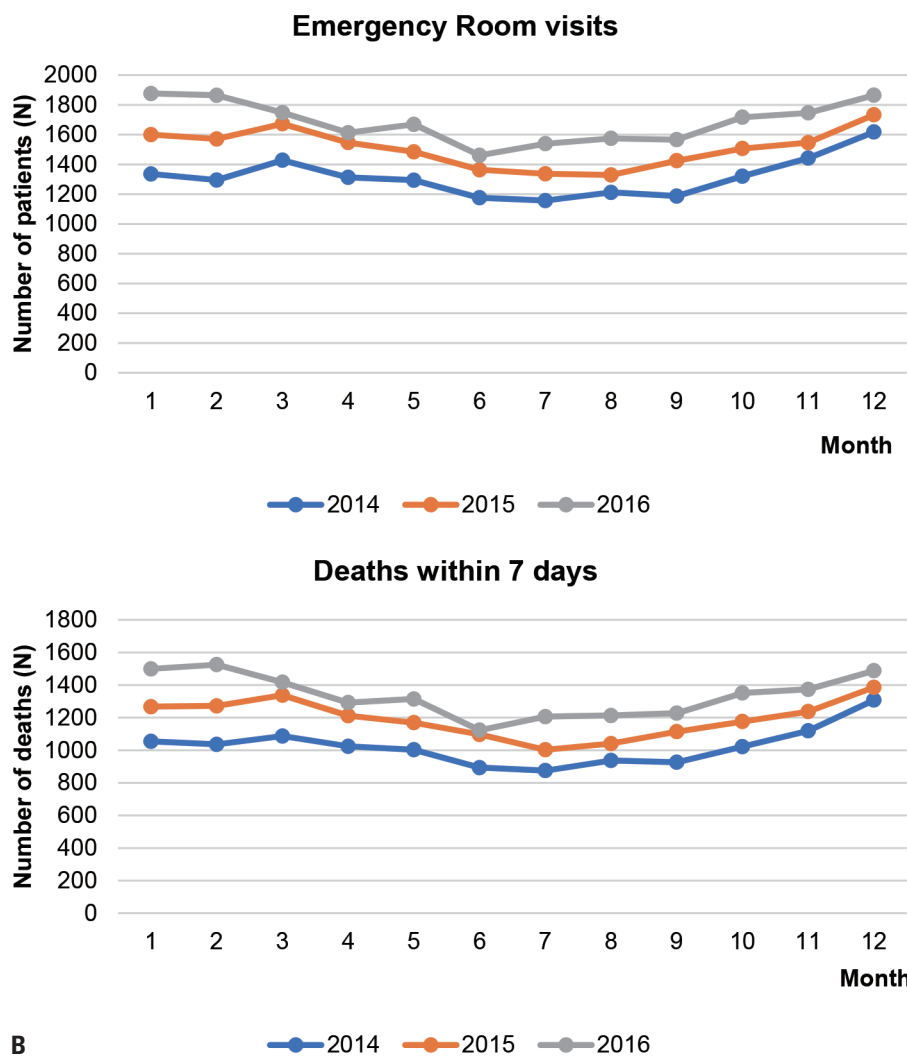

**B** **Supplementary Fig. 2.** Trends in emergency room visits and deaths within 7 days between 2014 and 2016 according to the diseases. (B) Monthly number of emergency room visits and deaths within 7 days of cardiac arrest.

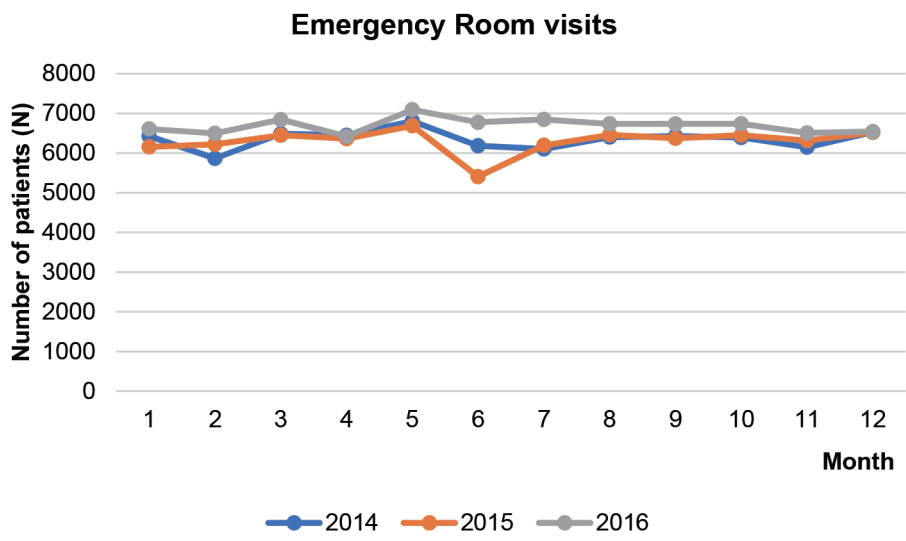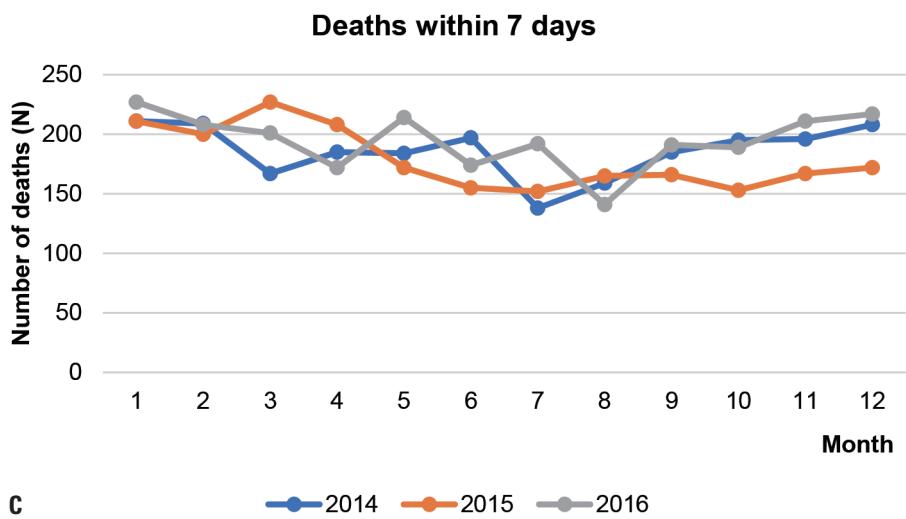

**C**      2014      2015      2016

**Supplementary Fig. 2.** Trends in emergency room visits and deaths within 7 days between 2014 and 2016 according to the diseases. (C) Monthly number of emergency room visits and deaths within 7 days of ischemic stroke.

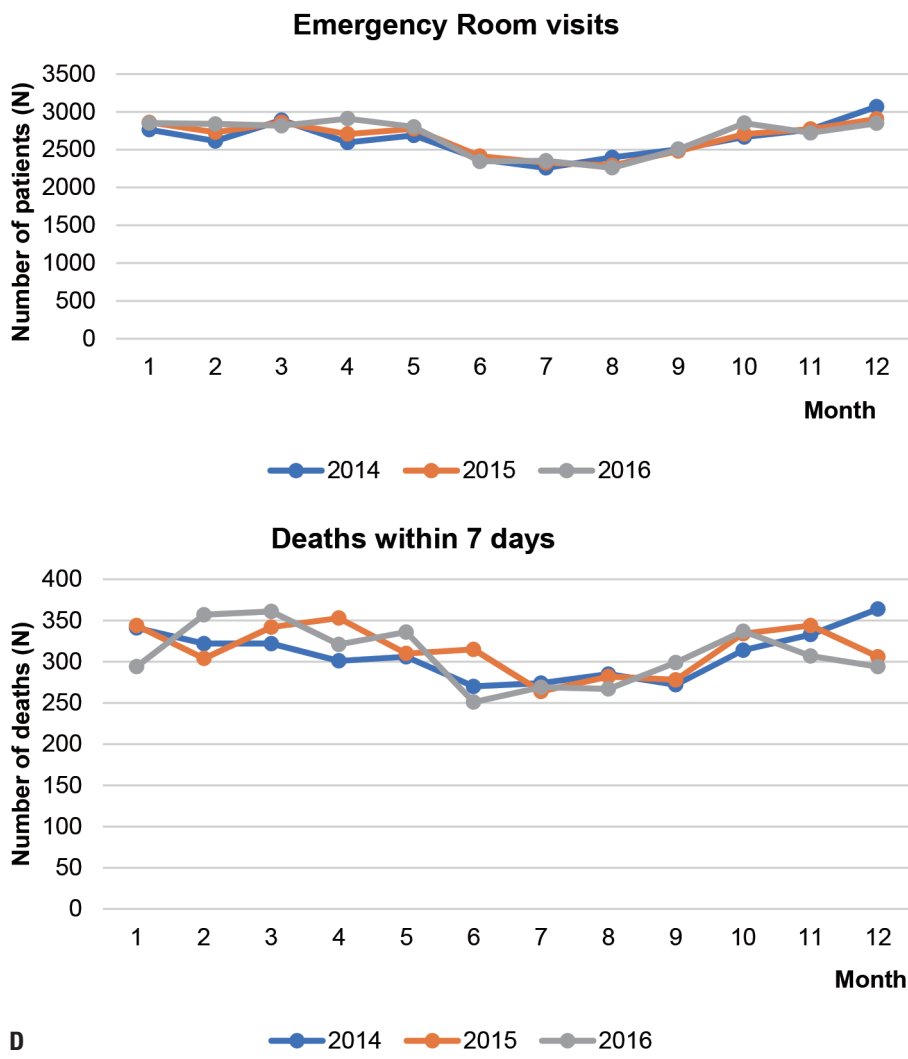

**D** **Supplementary Fig. 2.** Trends in emergency room visits and deaths within 7 days between 2014 and 2016 according to the diseases. (D) Monthly number of emergency room visits and deaths within 7 days of hemorrhagic stroke.

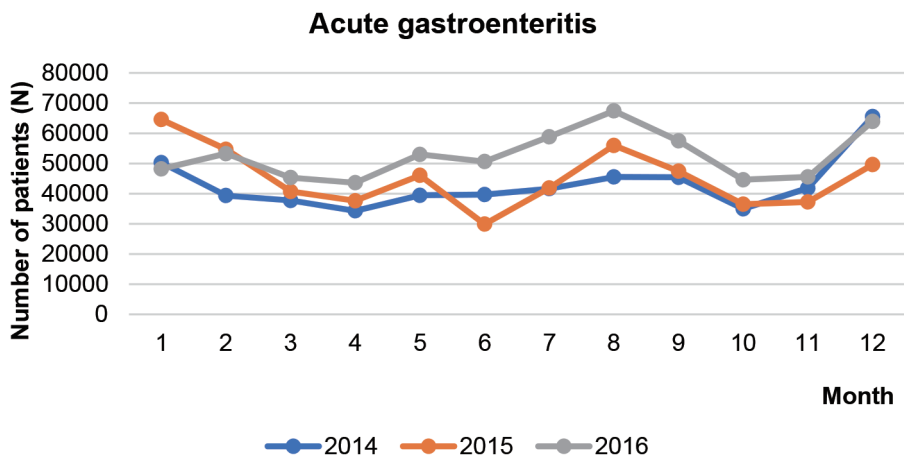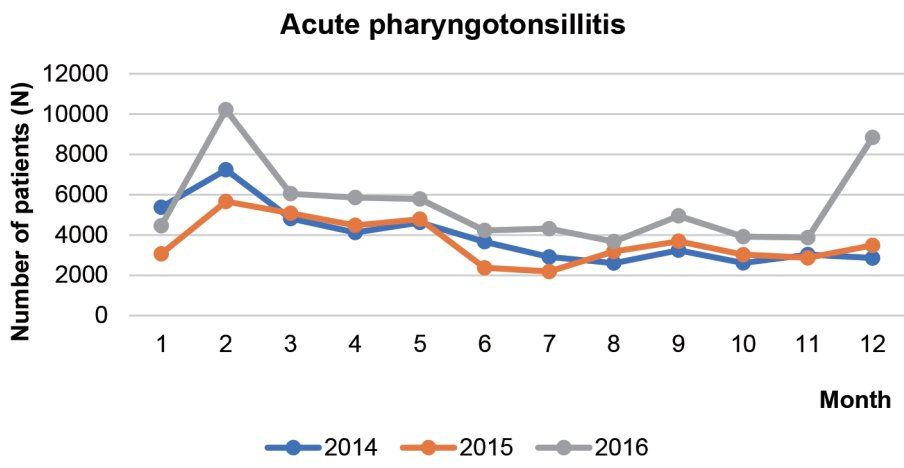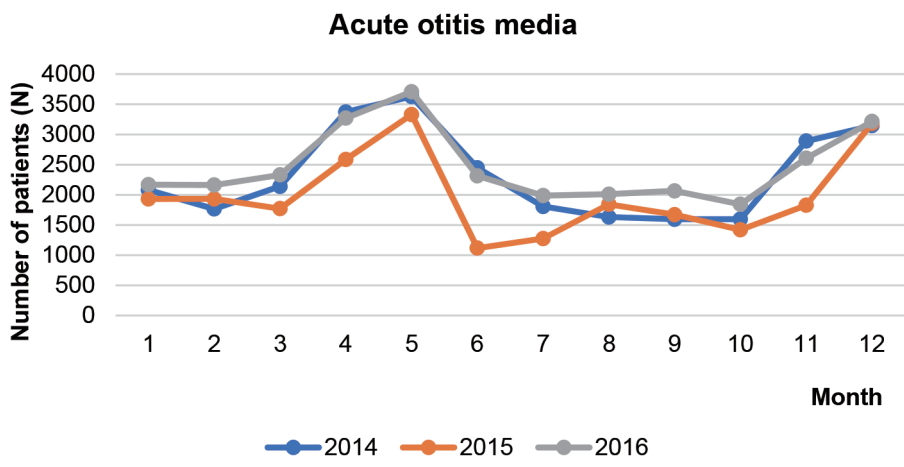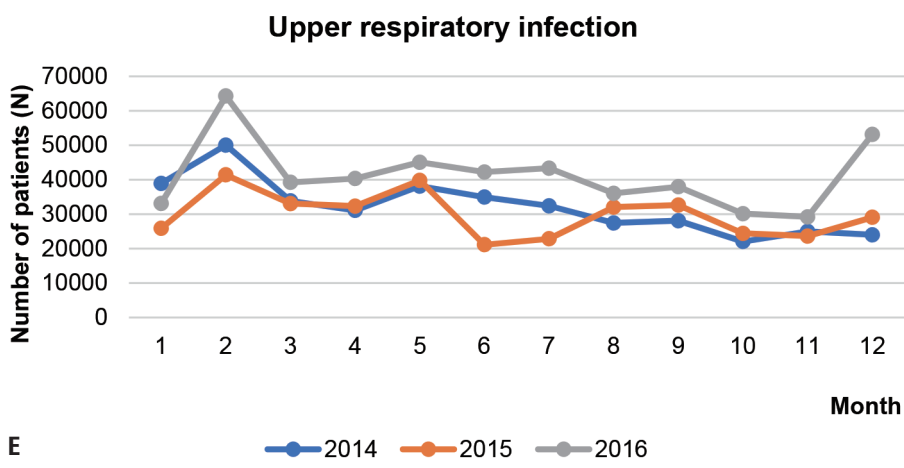

E

**Supplementary Fig. 2.** Trends in emergency room visits and deaths within 7 days between 2014 and 2016 according to the diseases. (E) Monthly number of emergency room visits of low acuity diseases.
