# Supplementary material for: Impact of the 2015 Middle East Respiratory Syndrome Outbreak on Emergency Care Utilization and Mortality in South Korea
Source: PubMed Central journal article supplement — Yonsei Med J. 2019 Jul 19;60(8):796–803. doi: 10.3349/ymj.2019.60.8.796 (PMC6660446; doi:10.3349/ymj.2019.60.8.796), 2019-07-19
Supplement: ymj-60-796-s003.pdf [file ymj-60-796-s003.pdf]

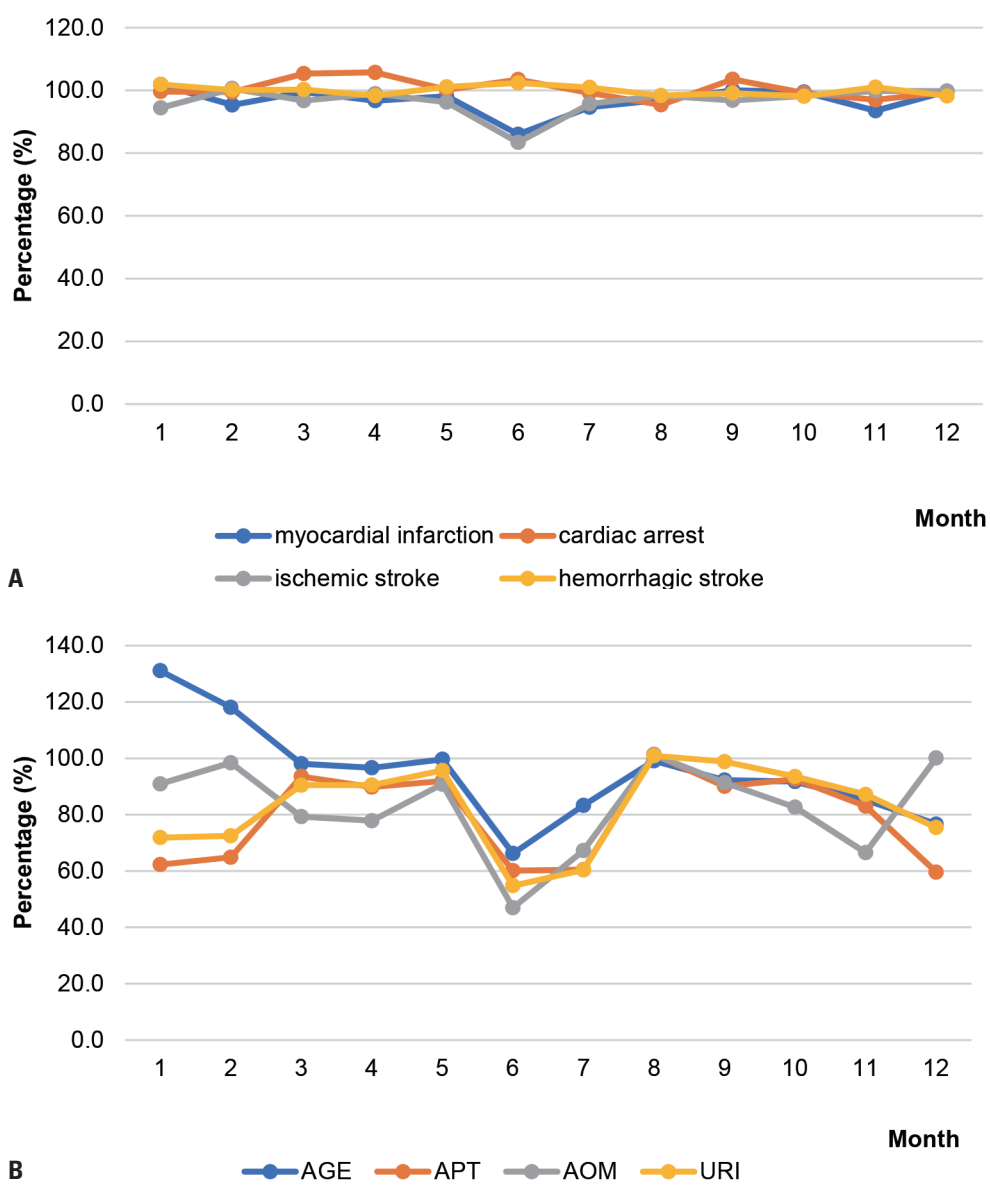

**Supplementary Fig. 3.** The ratio of emergency room visits in 2015 compared with averages of 2014 and 2016 by disease severity. (A) The ratio of emergency room visits in 2015 of high acuity diseases. (B) The ratio of emergency room visits in 2015 of low acuity disease. AGE, acute gastroenteritis; APT, acute pharyngotonsillitis; AOM, acute otitis media; URI, upper respiratory infection.
