# Supplementary material for: Impact of the 2015 Middle East Respiratory Syndrome Outbreak on Emergency Care Utilization and Mortality in South Korea
Source: PubMed Central journal article supplement — Yonsei Med J. 2019 Jul 19;60(8):796–803. doi: 10.3349/ymj.2019.60.8.796 (PMC6660446; doi:10.3349/ymj.2019.60.8.796), 2019-07-19
Supplement: ymj-60-796-s005.pdf [file ymj-60-796-s005.pdf]

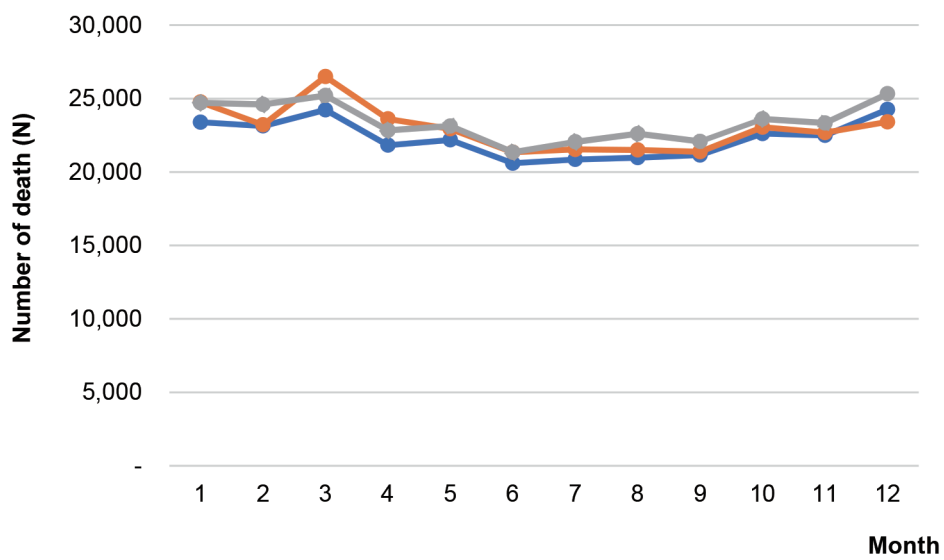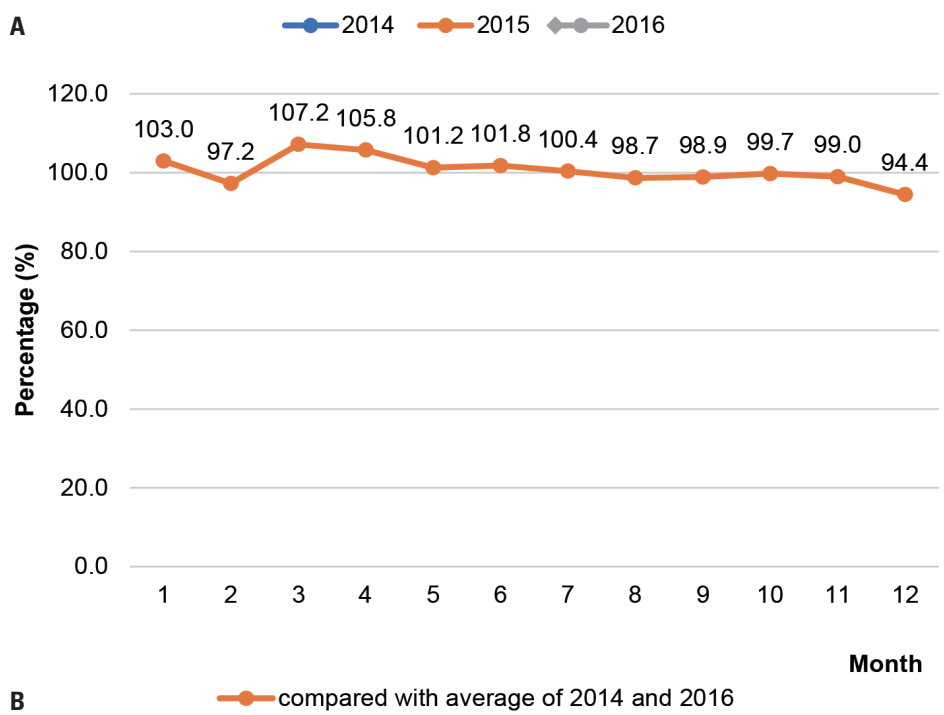

**Supplementary Fig. 5.** Trends in overall mortality between 2014 and 2016 (data from Korea mortality statistics, <http://kostat.go.kr/portal/korea/index.action>). (A) Monthly number of deaths. (B) The ratio of mortality in 2015 compared with the averages of 2014 and 2016.
