# Supplementary material for: Impact of the 2015 Middle East Respiratory Syndrome Outbreak on Emergency Care Utilization and Mortality in South Korea
Source: PubMed Central journal article supplement — Yonsei Med J. 2019 Jul 19;60(8):796–803. doi: 10.3349/ymj.2019.60.8.796 (PMC6660446; doi:10.3349/ymj.2019.60.8.796), 2019-07-19
Supplement: ymj-60-796-s006.pdf [file ymj-60-796-s006.pdf]

**Supplementary Table 1.** Monthly Number of Emergency Room Visits between 2014 and 2016

| Month             | ER visits (n) |         |         | Ratio of ER visits in 2015 (%) |       |            |
|-------------------|---------------|---------|---------|--------------------------------|-------|------------|
|                   | 2014          | 2015    | 2016    | 2014                           | 2016  | 2014–2016* |
| Total             | 5421193       | 5390879 | 6153683 | 99.4                           | 87.6  | 93.1       |
| January           | 447066        | 442714  | 438248  | 99.0                           | 101.0 | 100.0      |
| February          | 438115        | 474691  | 538662  | 108.3                          | 88.1  | 97.2       |
| March             | 437415        | 458887  | 473126  | 104.9                          | 97.0  | 100.8      |
| April             | 419853        | 440916  | 480683  | 105.0                          | 91.7  | 97.9       |
| May               | 492779        | 516737  | 541271  | 104.9                          | 95.5  | 99.9       |
| June <sup>†</sup> | 467394        | 354400  | 517246  | 75.8                           | 68.5  | 72.0       |
| July <sup>†</sup> | 462225        | 426910  | 549830  | 92.4                           | 77.6  | 84.4       |
| August            | 479792        | 505088  | 560006  | 105.3                          | 90.2  | 97.2       |
| September         | 478658        | 493758  | 565635  | 103.2                          | 87.3  | 94.6       |
| October           | 426750        | 438275  | 494067  | 102.7                          | 88.7  | 95.2       |
| November          | 419735        | 402060  | 446944  | 95.8                           | 90.0  | 92.8       |
| December          | 451411        | 436443  | 547965  | 96.7                           | 79.6  | 87.3       |

ER, emergency room.

Ratio of ER visits in 2015 (%): compared with 2014, 2016, and averages of 2014 and 2016, respectively.

\*Averages of 2014 and 2016; <sup>†</sup>Values in the Middle East respiratory syndrome epidemic period (June to July).
