# Supplementary material for: Impact of the 2015 Middle East Respiratory Syndrome Outbreak on Emergency Care Utilization and Mortality in South Korea
Source: PubMed Central journal article supplement — Yonsei Med J. 2019 Jul 19;60(8):796–803. doi: 10.3349/ymj.2019.60.8.796 (PMC6660446; doi:10.3349/ymj.2019.60.8.796), 2019-07-19
Supplement: ymj-60-796-s007.pdf [file ymj-60-796-s007.pdf]

**Supplementary Table 2.** Trends in Emergency Room Visits and Deaths within 7 Days between 2014 and 2016 according to the Age, Sex, and Socioeconomic Position

A. Monthly number of emergency room visit and deaths within 7 days according to the age, sex, and socioeconomic position.

| Year | Month | Total  |        | Age          |        |               |        |               |        | Sex    |        |        |        | Socioeconomic position* |        |           |        |            |        |            |        |             |        |
|------|-------|--------|--------|--------------|--------|---------------|--------|---------------|--------|--------|--------|--------|--------|-------------------------|--------|-----------|--------|------------|--------|------------|--------|-------------|--------|
|      |       |        |        | Child (0–19) |        | Adult (20–59) |        | Elderly (60–) |        | Male   |        | Female |        | Q1, Lowest              |        | Q2, Lower |        | Q3, medium |        | Q4, higher |        | Q5, highest |        |
|      |       | Visits | Deaths | Visits       | Deaths | Visits        | Deaths | Visits        | Deaths | Visits | Deaths | Visits | Deaths | Visits                  | Deaths | Visits    | Deaths | Visits     | Deaths | Visits     | Deaths | Visits      | Deaths |
| 2014 | Jan   | 447066 | 5573   | 128049       | 76     | 209968        | 2158   | 109049        | 4232   | 229182 | 3319   | 217884 | 2254   | 57813                   | 803    | 59067     | 665    | 77988      | 807    | 100325     | 1044   | 114953      | 1479   |
|      | Feb   | 438115 | 5944   | 137896       | 85     | 192624        | 2208   | 107595        | 4564   | 224311 | 3465   | 213804 | 2479   | 56089                   | 797    | 56860     | 673    | 76665      | 824    | 98937      | 1096   | 113411      | 1703   |
|      | Mar   | 437415 | 5716   | 130203       | 68     | 195830        | 2219   | 111382        | 4297   | 229655 | 3316   | 207760 | 2400   | 57104                   | 807    | 57295     | 642    | 75139      | 806    | 97672      | 998    | 112788      | 1643   |
|      | Apr   | 419853 | 5337   | 131459       | 63     | 184430        | 2026   | 103964        | 4049   | 224037 | 3135   | 195816 | 2202   | 54716                   | 835    | 55825     | 627    | 73450      | 756    | 93575      | 946    | 106432      | 1409   |
|      | May   | 492779 | 5519   | 157768       | 84     | 217439        | 2231   | 117572        | 4078   | 261698 | 3287   | 231081 | 2232   | 63652                   | 769    | 65292     | 708    | 86775      | 828    | 111009     | 999    | 125601      | 1474   |
|      | Jun†  | 467394 | 4975   | 147228       | 61     | 211379        | 2030   | 108787        | 3653   | 249762 | 2976   | 217632 | 1999   | 60646                   | 740    | 62534     | 602    | 82436      | 732    | 104784     | 876    | 118611      | 1384   |
|      | Jul†  | 462225 | 4899   | 138209       | 72     | 215094        | 2003   | 108922        | 3573   | 246721 | 2852   | 215504 | 2047   | 60573                   | 685    | 62587     | 607    | 81835      | 723    | 101858     | 892    | 117059      | 1349   |
|      | Aug   | 479792 | 5115   | 129017       | 53     | 234670        | 2125   | 116105        | 3771   | 256372 | 3154   | 223420 | 1961   | 63834                   | 709    | 65531     | 644    | 84629      | 759    | 104837     | 981    | 121528      | 1433   |
|      | Sep   | 478658 | 5253   | 131318       | 67     | 229731        | 2194   | 117609        | 3841   | 251922 | 3074   | 226736 | 2179   | 63359                   | 759    | 64628     | 624    | 83592      | 737    | 104962     | 934    | 122570      | 1488   |
|      | Oct   | 426750 | 5530   | 113459       | 59     | 204017        | 2216   | 109274        | 4141   | 225525 | 3288   | 201225 | 2242   | 57231                   | 815    | 57454     | 675    | 74485      | 776    | 93081      | 999    | 108766      | 1577   |
|      | Nov   | 419735 | 5420   | 123036       | 71     | 192536        | 2098   | 104163        | 4111   | 219594 | 3110   | 200141 | 2310   | 55077                   | 786    | 55981     | 600    | 74724      | 710    | 92650      | 974    | 106937      | 1594   |
|      | Dec   | 451411 | 6080   | 133188       | 62     | 209484        | 2401   | 108739        | 4561   | 230062 | 3562   | 221349 | 2518   | 59641                   | 862    | 60951     | 677    | 79745      | 963    | 100172     | 1064   | 115213      | 1723   |
| 2015 | Jan   | 442714 | 5981   | 119658       | 59     | 207916        | 2177   | 115140        | 4628   | 225174 | 3441   | 217540 | 2540   | 60520                   | 858    | 56633     | 666    | 76446      | 868    | 97081      | 1052   | 113981      | 1681   |
|      | Feb   | 474691 | 6008   | 134634       | 40     | 214818        | 2119   | 125239        | 4735   | 239019 | 3397   | 235672 | 2611   | 64545                   | 867    | 59023     | 647    | 81562      | 844    | 106154     | 1084   | 123708      | 1703   |
|      | Mar   | 458887 | 6579   | 129851       | 69     | 201580        | 2324   | 127456        | 5180   | 238168 | 3704   | 220719 | 2875   | 62887                   | 1039   | 57146     | 725    | 78219      | 886    | 100298     | 1160   | 119805      | 1832   |
|      | Apr   | 440916 | 5781   | 129734       | 52     | 194646        | 2209   | 116536        | 4416   | 231638 | 3398   | 209278 | 2383   | 60168                   | 856    | 55525     | 647    | 75847      | 798    | 97510      | 1087   | 113555      | 1655   |
|      | May   | 516737 | 5690   | 161265       | 80     | 228038        | 2194   | 127434        | 4262   | 273429 | 3339   | 243308 | 2351   | 70074                   | 854    | 65124     | 646    | 90890      | 716    | 115514     | 1071   | 132247      | 1643   |
|      | Jun†  | 354400 | 5121   | 90140        | 59     | 172694        | 2005   | 91566         | 3876   | 193584 | 3036   | 160816 | 2085   | 50958                   | 731    | 47866     | 555    | 62568      | 766    | 75343      | 899    | 85745       | 1460   |
|      | Jul†  | 426910 | 5160   | 112626       | 55     | 205690        | 2093   | 108594        | 3803   | 227771 | 3048   | 199139 | 2112   | 59583                   | 821    | 56456     | 571    | 75134      | 724    | 92933      | 960    | 106300      | 1453   |
|      | Aug   | 505088 | 5114   | 141088       | 82     | 241580        | 2048   | 122420        | 3786   | 267598 | 3070   | 237490 | 2044   | 70406                   | 815    | 66197     | 541    | 88972      | 730    | 111051     | 954    | 126918      | 1399   |
|      | Sep   | 493758 | 5372   | 139030       | 78     | 233040        | 2126   | 121688        | 4031   | 261480 | 3223   | 232278 | 2149   | 67997                   | 811    | 64052     | 570    | 86626      | 760    | 109113     | 997    | 125713      | 1498   |
|      | Oct   | 438275 | 5532   | 115074       | 57     | 206711        | 2231   | 116490        | 4198   | 230915 | 3264   | 207360 | 2268   | 61230                   | 820    | 56578     | 652    | 76147      | 741    | 95625      | 949    | 111714      | 1625   |
|      | Nov   | 402060 | 5551   | 110106       | 77     | 185478        | 2195   | 106476        | 4173   | 209187 | 3306   | 192873 | 2245   | 55816                   | 828    | 51993     | 653    | 69918      | 814    | 88449      | 974    | 101983      | 1530   |
|      | Dec   | 436443 | 5896   | 133181       | 57     | 193618        | 2240   | 109644        | 4507   | 227086 | 3483   | 209357 | 2413   | 59512                   | 896    | 56285     | 705    | 77965      | 783    | 97514      | 1122   | 109216      | 1618   |
| 2016 | Jan   | 438248 | 6179   | 115495       | 63     | 200953        | 2213   | 121800        | 4875   | 224306 | 3530   | 213942 | 2649   | 57519                   | 835    | 59129     | 743    | 75421      | 829    | 95806      | 1082   | 110143      | 1711   |

|      |        |      |        |    |        |      |        |      |        |      |        |      |       |     |       |     |       |     |        |      |        |      |
|------|--------|------|--------|----|--------|------|--------|------|--------|------|--------|------|-------|-----|-------|-----|-------|-----|--------|------|--------|------|
| Feb  | 538662 | 6508 | 153516 | 62 | 244205 | 2331 | 140941 | 5172 | 269472 | 3692 | 269190 | 2816 | 70147 | 976 | 72087 | 750 | 92693 | 863 | 120261 | 1099 | 136423 | 1861 |
| Mar  | 473126 | 6234 | 133936 | 67 | 209057 | 2359 | 130133 | 4844 | 245185 | 3677 | 227941 | 2557 | 61993 | 844 | 63980 | 729 | 80761 | 867 | 102878 | 1145 | 120118 | 1772 |
| Apr  | 480683 | 5735 | 139108 | 53 | 212331 | 2256 | 129244 | 4380 | 251765 | 3401 | 228918 | 2334 | 62479 | 826 | 64830 | 717 | 82746 | 810 | 106309 | 995  | 120787 | 1591 |
| May  | 541271 | 5924 | 156402 | 73 | 241593 | 2230 | 143276 | 4577 | 283900 | 3456 | 257371 | 2468 | 70918 | 849 | 72787 | 738 | 93752 | 768 | 118791 | 1064 | 136986 | 1660 |
| Jun† | 517246 | 5348 | 151451 | 42 | 230748 | 2068 | 135047 | 4101 | 271541 | 3149 | 245705 | 2199 | 68071 | 816 | 69989 | 651 | 90154 | 737 | 113017 | 938  | 129960 | 1464 |
| Jul† | 549830 | 5478 | 158403 | 69 | 251834 | 2144 | 139593 | 4125 | 289383 | 3262 | 260447 | 2216 | 72457 | 870 | 75520 | 617 | 96310 | 782 | 121020 | 976  | 135903 | 1485 |
| Aug  | 560006 | 5575 | 140282 | 70 | 270041 | 2240 | 149683 | 4107 | 292354 | 3279 | 267652 | 2296 | 75145 | 784 | 77877 | 655 | 97263 | 787 | 121070 | 990  | 138775 | 1529 |
| Sep  | 565635 | 5675 | 139380 | 61 | 273908 | 2297 | 152347 | 4253 | 295068 | 3360 | 270567 | 2315 | 75745 | 800 | 77992 | 720 | 97991 | 773 | 122842 | 1037 | 141387 | 1583 |
| Oct  | 494067 | 6048 | 118909 | 50 | 236674 | 2369 | 138484 | 4616 | 258349 | 3601 | 235718 | 2447 | 66719 | 877 | 68512 | 759 | 85305 | 834 | 105751 | 1017 | 123588 | 1673 |
| Nov  | 446944 | 6014 | 122115 | 66 | 202124 | 2203 | 122705 | 4684 | 232197 | 3449 | 214747 | 2565 | 59264 | 867 | 61399 | 756 | 78258 | 854 | 96687  | 1024 | 111258 | 1702 |
| Dec  | 547965 | 6393 | 180491 | 75 | 235348 | 2387 | 132126 | 4930 | 278674 | 3642 | 269291 | 2751 | 71885 | 894 | 73745 | 768 | 95746 | 846 | 122952 | 1085 | 137854 | 1841 |

Q, quintile; Jan, January; Feb, February; Mar, March; Apr, April; Jun, June; Jul, July; Aug, August; Sep, September; Oct, October; Nov, November; Dec, December.

\*The socioeconomic position was categorized for patients who had data on insurance contributions (91.45% of total emergency room visits); †Values in the Middle East respiratory syndrome epidemic period (June to July).

B. The ratio of emergency room visits and deaths within 7 days in 2015 compared with the averages of 2014 and 2016 according to the age, sex, and socioeconomic position (%).

| Month     | Age          |        |               |        |               |        | Sex    |        |        |        | Socioeconomic position |        |           |        |            |        |            |        |             |        |
|-----------|--------------|--------|---------------|--------|---------------|--------|--------|--------|--------|--------|------------------------|--------|-----------|--------|------------|--------|------------|--------|-------------|--------|
|           | Child (0–19) |        | Adult (20–59) |        | Elderly (60-) |        | Male   |        | Female |        | Q1, Lowest             |        | Q2, Lower |        | Q3, medium |        | Q4, higher |        | Q5, highest |        |
|           | Visits       | Deaths | Visits        | Deaths | Visits        | Deaths | Visits | Deaths | Visits | Deaths | Visits                 | Deaths | Visits    | Deaths | Visits     | Deaths | Visits     | Deaths | Visits      | Deaths |
| January   | 98.3         | 84.9   | 101.2         | 99.6   | 99.8          | 101.6  | 99.3   | 100.5  | 100.8  | 103.6  | 104.9                  | 104.8  | 95.8      | 94.6   | 99.7       | 106.1  | 99.0       | 99.0   | 101.3       | 105.4  |
| February  | 92.4         | 54.4   | 98.4          | 93.4   | 100.8         | 97.3   | 96.8   | 94.9   | 97.6   | 98.6   | 102.3                  | 97.8   | 91.5      | 90.9   | 96.3       | 100.1  | 96.9       | 98.8   | 99.0        | 95.6   |
| March     | 98.3         | 102.2  | 99.6          | 101.5  | 105.5         | 113.3  | 100.3  | 105.9  | 101.3  | 116.0  | 105.6                  | 125.9  | 94.2      | 105.8  | 100.3      | 105.9  | 100.0      | 108.3  | 102.9       | 107.3  |
| April     | 95.9         | 89.7   | 98.1          | 103.2  | 99.9          | 104.8  | 97.4   | 104.0  | 98.5   | 105.1  | 102.7                  | 103.1  | 92.0      | 96.3   | 97.1       | 101.9  | 97.6       | 112.0  | 100.0       | 110.3  |
| May       | 102.7        | 101.9  | 99.4          | 98.4   | 97.7          | 98.5   | 100.2  | 99.0   | 99.6   | 100.0  | 104.1                  | 105.6  | 94.3      | 89.3   | 100.7      | 89.7   | 100.5      | 103.8  | 100.7       | 104.9  |
| June*     | 60.4         | 114.6  | 78.1          | 97.9   | 75.1          | 100.0  | 74.3   | 99.1   | 69.4   | 99.3   | 79.2                   | 94.0   | 72.2      | 88.6   | 72.5       | 104.3  | 69.2       | 99.1   | 69.0        | 102.5  |
| July*     | 75.9         | 78.0   | 88.1          | 100.9  | 87.4          | 98.8   | 85.0   | 99.7   | 83.7   | 99.1   | 89.6                   | 105.6  | 81.8      | 93.3   | 84.4       | 96.2   | 83.4       | 102.8  | 84.0        | 102.5  |
| August    | 104.8        | 133.3  | 95.7          | 93.8   | 92.1          | 96.1   | 97.5   | 95.4   | 96.7   | 96.0   | 101.3                  | 109.2  | 92.3      | 83.3   | 97.8       | 94.4   | 98.3       | 96.8   | 97.5        | 94.5   |
| September | 102.7        | 121.9  | 92.5          | 94.7   | 90.2          | 99.6   | 95.6   | 100.2  | 93.4   | 95.6   | 97.8                   | 104.0  | 89.8      | 84.8   | 95.4       | 100.7  | 95.8       | 101.2  | 95.3        | 97.6   |
| October   | 99.0         | 104.6  | 93.8          | 97.3   | 94.0          | 95.9   | 95.4   | 94.8   | 94.9   | 96.7   | 98.8                   | 96.9   | 89.8      | 90.9   | 95.3       | 92.0   | 96.2       | 94.1   | 96.2        | 100.0  |
| November  | 89.8         | 112.4  | 94.0          | 102.1  | 93.9          | 94.9   | 92.6   | 100.8  | 93.0   | 92.1   | 97.6                   | 100.2  | 88.6      | 96.3   | 91.4       | 104.1  | 93.4       | 97.5   | 93.5        | 92.8   |
| December  | 84.9         | 83.2   | 87.1          | 93.6   | 91.0          | 95.0   | 89.3   | 96.7   | 85.3   | 91.6   | 90.5                   | 102.1  | 83.6      | 97.6   | 88.9       | 86.6   | 87.4       | 104.4  | 86.3        | 90.8   |

Q, quintile.

\*Values in the Middle East respiratory syndrome epidemic period (June to July).
