# Supplementary material for: Impact of the 2015 Middle East Respiratory Syndrome Outbreak on Emergency Care Utilization and Mortality in South Korea
Source: PubMed Central journal article supplement — Yonsei Med J. 2019 Jul 19;60(8):796–803. doi: 10.3349/ymj.2019.60.8.796 (PMC6660446; doi:10.3349/ymj.2019.60.8.796), 2019-07-19
Supplement: ymj-60-796-s008.pdf [file ymj-60-796-s008.pdf]

**Supplementary Table 3.** Trends in Emergency Room Visits and Deaths within 7 Days between 2014 and 2016 according to the Diseases

A. Monthly number of emergency room visits and deaths within 7 days of myocardial infarction.

| Month             | Number of ER visits (n) |      |      | Ratio of ER visits in 2015 (%) |      |            | Number of deaths within 7 days (n) |      |      | Ratio of deaths in 2015 (%) |       |       |
|-------------------|-------------------------|------|------|--------------------------------|------|------------|------------------------------------|------|------|-----------------------------|-------|-------|
|                   | 2014                    | 2015 | 2016 | 2014                           | 2016 | 2014–2016* | 2014                               | 2015 | 2016 | 2014                        | 2015  | 2016  |
| January           | 2342                    | 2522 | 2608 | 107.7                          | 96.7 | 101.9      | 225                                | 266  | 219  | 118.2                       | 121.5 | 119.8 |
| February          | 2341                    | 2410 | 2714 | 102.9                          | 88.8 | 95.4       | 262                                | 244  | 269  | 93.1                        | 90.7  | 91.9  |
| March             | 2449                    | 2619 | 2816 | 106.9                          | 93.0 | 99.5       | 250                                | 257  | 251  | 102.8                       | 102.4 | 102.6 |
| April             | 2461                    | 2478 | 2664 | 100.7                          | 93.0 | 96.7       | 247                                | 255  | 240  | 103.2                       | 106.3 | 104.7 |
| May               | 2443                    | 2545 | 2742 | 104.2                          | 92.8 | 98.2       | 225                                | 236  | 276  | 104.9                       | 85.5  | 94.2  |
| June <sup>†</sup> | 2260                    | 2079 | 2575 | 92.0                           | 80.7 | 86.0       | 215                                | 205  | 219  | 95.3                        | 93.6  | 94.5  |
| July <sup>†</sup> | 2283                    | 2315 | 2610 | 101.4                          | 88.7 | 94.6       | 213                                | 214  | 236  | 100.5                       | 90.7  | 95.3  |
| August            | 2313                    | 2367 | 2571 | 102.3                          | 92.1 | 96.9       | 217                                | 213  | 234  | 98.2                        | 91.0  | 94.5  |
| September         | 2380                    | 2508 | 2634 | 105.4                          | 95.2 | 100.0      | 235                                | 237  | 242  | 100.9                       | 97.9  | 99.4  |
| October           | 2405                    | 2550 | 2721 | 106.0                          | 93.7 | 99.5       | 252                                | 221  | 285  | 87.7                        | 77.5  | 82.3  |
| November          | 2368                    | 2400 | 2765 | 101.4                          | 86.8 | 93.5       | 248                                | 225  | 267  | 90.7                        | 84.3  | 87.4  |
| December          | 2546                    | 2656 | 2780 | 104.3                          | 95.5 | 99.7       | 273                                | 282  | 268  | 103.3                       | 105.2 | 104.3 |

ER, emergency room.

Ratio of ER visits in 2015 (%), Ratio of deaths of 2015: compared with 2014, 2016, and averages of 2014 and 2016, respectively.

\*Averages of 2014 and 2016; <sup>†</sup>Values in the Middle East respiratory syndrome epidemic period (June to July).

B. Monthly number of emergency room visits and deaths within 7 days of cardiac arrest.

| Month             | Number of ER visits (n) |      |      | Ratio of ER visits in 2015 (%) |      |            | Number of deaths within 7 days (n) |      |      | Ratio of deaths in 2015 (%) |      |       |
|-------------------|-------------------------|------|------|--------------------------------|------|------------|------------------------------------|------|------|-----------------------------|------|-------|
|                   | 2014                    | 2015 | 2016 | 2014                           | 2016 | 2014–2016* | 2014                               | 2015 | 2016 | 2014                        | 2015 | 2016  |
| January           | 1336                    | 1600 | 1876 | 119.8                          | 85.3 | 99.6       | 1054                               | 1267 | 1499 | 120.2                       | 84.5 | 99.3  |
| February          | 1295                    | 1571 | 1864 | 121.3                          | 84.3 | 99.5       | 1036                               | 1272 | 1525 | 122.8                       | 83.4 | 99.3  |
| March             | 1428                    | 1673 | 1748 | 117.2                          | 95.7 | 105.4      | 1087                               | 1338 | 1417 | 123.1                       | 94.4 | 106.9 |
| April             | 1313                    | 1547 | 1613 | 117.8                          | 95.9 | 105.7      | 1024                               | 1212 | 1292 | 118.4                       | 93.8 | 104.7 |
| May               | 1294                    | 1485 | 1669 | 114.8                          | 89.0 | 100.2      | 1003                               | 1169 | 1314 | 116.6                       | 89.0 | 100.9 |
| June <sup>†</sup> | 1176                    | 1364 | 1461 | 116.0                          | 93.4 | 103.5      | 893                                | 1097 | 1123 | 122.8                       | 97.7 | 108.8 |
| July <sup>†</sup> | 1157                    | 1337 | 1539 | 115.6                          | 86.9 | 99.2       | 875                                | 1003 | 1206 | 114.6                       | 83.2 | 96.4  |
| August            | 1212                    | 1329 | 1575 | 109.7                          | 84.4 | 95.4       | 937                                | 1041 | 1213 | 111.1                       | 85.8 | 96.8  |
| September         | 1187                    | 1425 | 1566 | 120.1                          | 91.0 | 103.5      | 926                                | 1114 | 1227 | 120.3                       | 90.8 | 103.5 |
| October           | 1321                    | 1507 | 1717 | 114.1                          | 87.8 | 99.2       | 1022                               | 1176 | 1351 | 115.1                       | 87.0 | 99.1  |
| November          | 1442                    | 1546 | 1746 | 107.2                          | 88.5 | 97.0       | 1119                               | 1237 | 1373 | 110.5                       | 90.1 | 99.3  |
| December          | 1618                    | 1733 | 1865 | 107.1                          | 92.9 | 99.5       | 1308                               | 1386 | 1488 | 106.0                       | 93.1 | 99.1  |

ER, emergency room

Ratio of ER visits in 2015 (%), Ratio of deaths of 2015: compared with 2014, 2016, and averages of 2014 and 2016, respectively.

\* Averages of 2014 and 2016; <sup>†</sup>Values in the Middle East respiratory syndrome epidemic period (June to July).

C. Monthly number of emergency room visits and deaths within 7 days of ischemic stroke.

| Month             | Number of ER visits (n) |      |      | Ratio of ER visits in 2015 (%) |      |            | Number of deaths within 7 days (n) |      |      | Ratio of deaths in 2015 (%) |       |       |
|-------------------|-------------------------|------|------|--------------------------------|------|------------|------------------------------------|------|------|-----------------------------|-------|-------|
|                   | 2014                    | 2015 | 2016 | 2014                           | 2016 | 2014–2016* | 2014                               | 2015 | 2016 | 2014                        | 2015  | 2016  |
| January           | 6427                    | 6155 | 6609 | 95.8                           | 93.1 | 94.4       | 211                                | 211  | 227  | 100.0                       | 93.0  | 96.3  |
| February          | 5868                    | 6220 | 6497 | 106.0                          | 95.7 | 100.6      | 209                                | 200  | 208  | 95.7                        | 96.2  | 95.9  |
| March             | 6486                    | 6448 | 6844 | 99.4                           | 94.2 | 96.7       | 167                                | 227  | 201  | 135.9                       | 112.9 | 123.4 |
| April             | 6448                    | 6365 | 6421 | 98.7                           | 99.1 | 98.9       | 185                                | 208  | 172  | 112.4                       | 120.9 | 116.5 |
| May               | 6806                    | 6689 | 7094 | 98.3                           | 94.3 | 96.2       | 184                                | 172  | 214  | 93.5                        | 80.4  | 86.4  |
| June <sup>†</sup> | 6185                    | 5406 | 6776 | 87.4                           | 79.8 | 83.4       | 197                                | 155  | 174  | 78.7                        | 89.1  | 83.6  |
| July <sup>†</sup> | 6103                    | 6197 | 6846 | 101.5                          | 90.5 | 95.7       | 138                                | 152  | 192  | 110.1                       | 79.2  | 92.1  |
| August            | 6403                    | 6459 | 6737 | 100.9                          | 95.9 | 98.3       | 159                                | 165  | 141  | 103.8                       | 117.0 | 110.0 |
| September         | 6427                    | 6372 | 6736 | 99.1                           | 94.6 | 96.8       | 185                                | 166  | 191  | 89.7                        | 86.9  | 88.3  |
| October           | 6393                    | 6449 | 6737 | 100.9                          | 95.7 | 98.2       | 195                                | 153  | 189  | 78.5                        | 81.0  | 79.7  |
| November          | 6147                    | 6316 | 6508 | 102.7                          | 97.0 | 99.8       | 196                                | 167  | 211  | 85.2                        | 79.1  | 82.1  |
| December          | 6530                    | 6520 | 6541 | 99.8                           | 99.7 | 99.8       | 208                                | 172  | 217  | 82.7                        | 79.3  | 80.9  |

ER, emergency room.

Ratio of ER visits in 2015 (%), Ratio of deaths of 2015: compared with 2014, 2016, and averages of 2014 and 2016, respectively.

\*Averages of 2014 and 2016; <sup>†</sup>Values in the Middle East respiratory syndrome epidemic period (June to July).

D. Monthly number of emergency room visits and deaths within 7 days of hemorrhagic stroke.

| Month             | Number of ER visits (n) |      |      | Ratio of ER visits in 2015 (%) |       |            | Number of deaths within 7 days (n) |      |      | Ratio of deaths in 2015 (%) |       |       |
|-------------------|-------------------------|------|------|--------------------------------|-------|------------|------------------------------------|------|------|-----------------------------|-------|-------|
|                   | 2014                    | 2015 | 2016 | 2014                           | 2016  | 2014–2016* | 2014                               | 2015 | 2016 | 2014                        | 2015  | 2016  |
| January           | 2764                    | 2861 | 2851 | 103.5                          | 100.4 | 101.9      | 341                                | 344  | 294  | 100.9                       | 117.0 | 108.3 |
| February          | 2614                    | 2730 | 2839 | 104.4                          | 96.2  | 100.1      | 322                                | 304  | 357  | 94.4                        | 85.2  | 89.5  |
| March             | 2890                    | 2860 | 2816 | 99.0                           | 101.6 | 100.2      | 322                                | 342  | 361  | 106.2                       | 94.7  | 100.1 |
| April             | 2595                    | 2707 | 2911 | 104.3                          | 93.0  | 98.3       | 301                                | 353  | 321  | 117.3                       | 110.0 | 113.5 |
| May               | 2689                    | 2776 | 2801 | 103.2                          | 99.1  | 101.1      | 306                                | 310  | 336  | 101.3                       | 92.3  | 96.6  |
| June <sup>†</sup> | 2372                    | 2415 | 2345 | 101.8                          | 103.0 | 102.4      | 270                                | 315  | 251  | 116.7                       | 125.5 | 120.9 |
| July <sup>†</sup> | 2258                    | 2327 | 2352 | 103.1                          | 98.9  | 101.0      | 274                                | 264  | 269  | 96.4                        | 98.1  | 97.2  |
| August            | 2398                    | 2291 | 2261 | 95.5                           | 101.3 | 98.3       | 285                                | 282  | 267  | 98.9                        | 105.6 | 102.2 |
| September         | 2505                    | 2482 | 2503 | 99.1                           | 99.2  | 99.1       | 272                                | 278  | 299  | 102.2                       | 93.0  | 97.4  |
| October           | 2667                    | 2707 | 2851 | 101.5                          | 94.9  | 98.1       | 314                                | 334  | 337  | 106.4                       | 99.1  | 102.6 |
| November          | 2766                    | 2773 | 2723 | 100.3                          | 101.8 | 101.0      | 333                                | 344  | 307  | 103.3                       | 112.1 | 107.5 |
| December          | 3068                    | 2906 | 2849 | 94.7                           | 102.0 | 98.2       | 364                                | 306  | 294  | 84.1                        | 104.1 | 93.0  |

ER, emergency room.

Ratio of ER visits in 2015 (%), Ratio of deaths of 2015: compared with 2014, 2016, and averages of 2014 and 2016, respectively.

\* Averages of 2014 and 2016; <sup>†</sup>Values in the Middle East respiratory syndrome epidemic period (June to July).

E. Monthly number of emergency room visits of low acuity diseases.

| Month             | Acute gastroenteritis   |       |       |                                |       |            | Acute otitis media      |      |      |                                |      |            |
|-------------------|-------------------------|-------|-------|--------------------------------|-------|------------|-------------------------|------|------|--------------------------------|------|------------|
|                   | Number of ER visits (n) |       |       | Ratio of ER visits in 2015 (%) |       |            | Number of ER visits (n) |      |      | Ratio of ER visits in 2015 (%) |      |            |
|                   | 2014                    | 2015  | 2016  | 2014                           | 2016  | 2014–2016* | 2014                    | 2015 | 2016 | 2014                           | 2016 | 2014–2016* |
| January           | 50304                   | 64571 | 48198 | 128.4                          | 134   | 131.1      | 2080                    | 1931 | 2168 | 92.8                           | 89.1 | 90.9       |
| February          | 39378                   | 54712 | 53269 | 138.9                          | 102.7 | 118.1      | 1766                    | 1933 | 2162 | 109.5                          | 89.4 | 98.4       |
| March             | 37754                   | 40725 | 45316 | 107.9                          | 89.9  | 98         | 2140                    | 1772 | 2330 | 82.8                           | 76.1 | 79.3       |
| April             | 34310                   | 37643 | 43609 | 109.7                          | 86.3  | 96.6       | 3373                    | 2586 | 3271 | 76.7                           | 79.1 | 77.8       |
| May               | 39456                   | 46071 | 53001 | 116.8                          | 86.9  | 99.7       | 3628                    | 3331 | 3708 | 91.8                           | 89.8 | 90.8       |
| June <sup>†</sup> | 39700                   | 29907 | 50650 | 75.3                           | 59    | 66.2       | 2447                    | 1118 | 2315 | 45.7                           | 48.3 | 47         |
| July <sup>†</sup> | 41653                   | 41856 | 58852 | 100.5                          | 71.1  | 83.3       | 1808                    | 1276 | 1987 | 70.6                           | 64.2 | 67.2       |
| August            | 45543                   | 55980 | 67440 | 122.9                          | 83    | 99.1       | 1632                    | 1843 | 2009 | 112.9                          | 91.7 | 101.2      |
| September         | 45389                   | 47460 | 57500 | 104.6                          | 82.5  | 92.3       | 1595                    | 1672 | 2065 | 104.8                          | 81   | 91.4       |
| October           | 34981                   | 36508 | 44610 | 104.4                          | 81.8  | 91.7       | 1596                    | 1421 | 1843 | 89                             | 77.1 | 82.6       |
| November          | 41853                   | 37238 | 45531 | 89                             | 81.8  | 85.2       | 2890                    | 1828 | 2606 | 63.3                           | 70.1 | 66.5       |
| December          | 65557                   | 49627 | 63957 | 75.7                           | 77.6  | 76.6       | 3146                    | 3184 | 3215 | 101.2                          | 99   | 100.1      |

  

| Month             | Acute pharyngotonsillitis |      |       |                                |      |            | Upper respiratory infection |       |       |                                |      |            |
|-------------------|---------------------------|------|-------|--------------------------------|------|------------|-----------------------------|-------|-------|--------------------------------|------|------------|
|                   | Number of ER visits (n)   |      |       | Ratio of ER visits in 2015 (%) |      |            | Number of ER visits (n)     |       |       | Ratio of ER visits in 2015 (%) |      |            |
|                   | 2014                      | 2015 | 2016  | 2014                           | 2016 | 2014–2016* | 2014                        | 2015  | 2016  | 2014                           | 2016 | 2014–2016* |
| January           | 5376                      | 3063 | 4460  | 57                             | 68.7 | 62.3       | 38946                       | 25882 | 33125 | 66.5                           | 78.1 | 71.8       |
| February          | 7237                      | 5661 | 10220 | 78.2                           | 55.4 | 64.9       | 50043                       | 41433 | 64308 | 82.8                           | 64.4 | 72.5       |
| March             | 4817                      | 5082 | 6047  | 105.5                          | 84   | 93.6       | 33855                       | 33065 | 39248 | 97.7                           | 84.2 | 90.5       |
| April             | 4122                      | 4480 | 5857  | 108.7                          | 76.5 | 89.8       | 31100                       | 32338 | 40366 | 104                            | 80.1 | 90.5       |
| May               | 4621                      | 4784 | 5784  | 103.5                          | 82.7 | 92         | 38143                       | 39821 | 45074 | 104.4                          | 88.3 | 95.7       |
| June <sup>†</sup> | 3663                      | 2370 | 4222  | 64.7                           | 56.1 | 60.1       | 34952                       | 21142 | 42239 | 60.5                           | 50.1 | 54.8       |
| July <sup>†</sup> | 2912                      | 2184 | 4313  | 75                             | 50.6 | 60.5       | 32430                       | 22876 | 43358 | 70.5                           | 52.8 | 60.4       |
| August            | 2606                      | 3183 | 3673  | 122.1                          | 86.7 | 101.4      | 27458                       | 32047 | 36051 | 116.7                          | 88.9 | 100.9      |
| September         | 3242                      | 3689 | 4950  | 113.8                          | 74.5 | 90.1       | 28088                       | 32644 | 37979 | 116.2                          | 86   | 98.8       |
| October           | 2613                      | 3022 | 3915  | 115.7                          | 77.2 | 92.6       | 22084                       | 24425 | 30147 | 110.6                          | 81   | 93.5       |
| November          | 3027                      | 2862 | 3868  | 94.5                           | 74   | 83         | 25016                       | 23631 | 29210 | 94.5                           | 80.9 | 87.2       |
| December          | 2855                      | 3484 | 8841  | 122                            | 39.4 | 59.6       | 23998                       | 29090 | 53138 | 121.2                          | 54.7 | 75.4       |

ER, emergency room.

Ratio of ER visits in 2015 (%), Ratio of deaths of 2015: compared with 2014, 2016, and averages of 2014 and 2016, respectively.

\* Averages of 2014 and 2016; <sup>†</sup> Values in the Middle East respiratory syndrome epidemic period (June to July).
