# Supplementary material for: Impact of the 2015 Middle East Respiratory Syndrome Outbreak on Emergency Care Utilization and Mortality in South Korea
Source: PubMed Central journal article supplement — Yonsei Med J. 2019 Jul 19;60(8):796–803. doi: 10.3349/ymj.2019.60.8.796 (PMC6660446; doi:10.3349/ymj.2019.60.8.796), 2019-07-19
Supplement: ymj-60-796-s009.pdf [file ymj-60-796-s009.pdf]

**Supplementary Table 4.** Monthly Number of Emergency Room Visits between 2014 and 2016 by Region

A. Monthly number of emergency room visits by region I (metropolitan cities).

| Month             | Seoul         |       |       |                                |       |            | Other metropolitan cities |        |        |                                |       |            |
|-------------------|---------------|-------|-------|--------------------------------|-------|------------|---------------------------|--------|--------|--------------------------------|-------|------------|
|                   | ER visits (n) |       |       | Ratio of ER visits in 2015 (%) |       |            | ER visits (n)             |        |        | Ratio of ER visits in 2015 (%) |       |            |
|                   | 2014          | 2015  | 2016  | 2014                           | 2016  | 2014–2016* | 2014                      | 2015   | 2016   | 2014                           | 2016  | 2014–2016* |
| January           | 87867         | 84010 | 79407 | 95.6                           | 105.8 | 100.4      | 103569                    | 106298 | 102325 | 102.6                          | 103.9 | 103.3      |
| February          | 84934         | 88317 | 93156 | 104.0                          | 94.8  | 99.2       | 101602                    | 112848 | 124130 | 111.1                          | 90.9  | 100.0      |
| March             | 83777         | 84408 | 83285 | 100.8                          | 101.3 | 101.0      | 101630                    | 107345 | 108644 | 105.6                          | 98.8  | 102.1      |
| April             | 80397         | 81844 | 84011 | 101.8                          | 97.4  | 99.6       | 96786                     | 102926 | 110894 | 106.3                          | 92.8  | 99.1       |
| May               | 95738         | 94951 | 94216 | 99.2                           | 100.8 | 100.0      | 113118                    | 120669 | 125709 | 106.7                          | 96.0  | 101.1      |
| June <sup>†</sup> | 91895         | 61372 | 91468 | 66.8                           | 67.1  | 66.9       | 106670                    | 86917  | 119892 | 81.5                           | 72.5  | 76.7       |
| July <sup>†</sup> | 90877         | 76472 | 96350 | 84.1                           | 79.4  | 81.7       | 106052                    | 103024 | 127931 | 97.1                           | 80.5  | 88.1       |
| August            | 92671         | 93976 | 98341 | 101.4                          | 95.6  | 98.4       | 111129                    | 118435 | 129465 | 106.6                          | 91.5  | 98.5       |
| September         | 91026         | 91766 | 97031 | 100.8                          | 94.6  | 97.6       | 112143                    | 115633 | 129755 | 103.1                          | 89.1  | 95.6       |
| October           | 82918         | 81927 | 86116 | 98.8                           | 95.1  | 96.9       | 99379                     | 103117 | 115489 | 103.8                          | 89.3  | 96.0       |
| November          | 81695         | 76240 | 78861 | 93.3                           | 96.7  | 95.0       | 97569                     | 94725  | 104467 | 97.1                           | 90.7  | 93.8       |
| December          | 87825         | 83370 | 97715 | 94.9                           | 85.3  | 89.9       | 108129                    | 104580 | 127585 | 96.7                           | 82.0  | 88.7       |

ER, emergency room.

Ratio of ER visits in 2015 (%): compared with 2014, 2016, and averages of 2014 and 2016, respectively.

\*Averages of 2014 and 2016; <sup>†</sup>Values in the Middle East respiratory syndrome epidemic period (June to July).

B. Monthly number of emergency room visits by region II (provinces).

| Month             | Gyeonggi province |        |        |                                |       |            | Other provinces |        |        |                                |      |            |
|-------------------|-------------------|--------|--------|--------------------------------|-------|------------|-----------------|--------|--------|--------------------------------|------|------------|
|                   | ER visits (n)     |        |        | Ratio of ER visits in 2015 (%) |       |            | ER visits (n)   |        |        | Ratio of ER visits in 2015 (%) |      |            |
|                   | 2014              | 2015   | 2016   | 2014                           | 2016  | 2014–2016* | 2014            | 2015   | 2016   | 2014                           | 2016 | 2014–2016* |
| January           | 107860            | 103300 | 99271  | 95.8                           | 104.1 | 99.7       | 147744          | 149065 | 157205 | 100.9                          | 94.8 | 97.8       |
| February          | 103548            | 109825 | 117549 | 106.1                          | 93.4  | 99.3       | 148005          | 163651 | 203769 | 110.6                          | 80.3 | 93.0       |
| March             | 101516            | 103817 | 103537 | 102.3                          | 100.3 | 101.3      | 150460          | 163276 | 177598 | 108.5                          | 91.9 | 99.5       |
| April             | 98497             | 102106 | 105202 | 103.7                          | 97.1  | 100.3      | 144136          | 153996 | 180511 | 106.8                          | 85.3 | 94.9       |
| May               | 115165            | 120263 | 119219 | 104.4                          | 100.9 | 102.6      | 168724          | 180795 | 202078 | 107.2                          | 89.5 | 97.5       |
| June <sup>†</sup> | 111636            | 75793  | 115493 | 67.9                           | 65.6  | 66.7       | 157158          | 130275 | 190351 | 82.9                           | 68.4 | 75.0       |
| July <sup>†</sup> | 110970            | 95609  | 124698 | 86.2                           | 76.7  | 81.1       | 154292          | 151767 | 200788 | 98.4                           | 75.6 | 85.5       |
| August            | 112945            | 117544 | 126091 | 104.1                          | 93.2  | 98.3       | 163005          | 175087 | 206064 | 107.4                          | 85.0 | 94.9       |
| September         | 112371            | 115195 | 124460 | 102.5                          | 92.6  | 97.3       | 163072          | 171119 | 214333 | 104.9                          | 79.8 | 90.7       |
| October           | 100010            | 101547 | 107645 | 101.5                          | 94.3  | 97.8       | 144412          | 151644 | 184779 | 105.0                          | 82.1 | 92.1       |
| November          | 100852            | 94755  | 100955 | 94.0                           | 93.9  | 93.9       | 139579          | 136291 | 162595 | 97.6                           | 83.8 | 90.2       |
| December          | 107390            | 103445 | 126500 | 96.3                           | 81.8  | 88.5       | 148025          | 145001 | 196103 | 98.0                           | 73.9 | 84.3       |

ER, emergency room.

Ratio of ER visits in 2015 (%): compared with 2014, 2016, and averages of 2014 and 2016, respectively.

\*Averages of 2014 and 2016; <sup>†</sup>Values in the Middle East respiratory syndrome epidemic period (June to July).

C. Monthly number of emergency room visits by region in Gyeonggi province (cities).

| Month             | ER visits (n)  |       |       |            |      |      |                 |      |      |          |       |       | Ratio of ER visits of 2015* (%) |            |                 |          |
|-------------------|----------------|-------|-------|------------|------|------|-----------------|------|------|----------|-------|-------|---------------------------------|------------|-----------------|----------|
|                   | High-risk area |       |       |            |      |      | Comparison area |      |      |          |       |       | High-risk area                  |            | Comparison area |          |
|                   | Suwon          |       |       | Pyeongtaek |      |      | Anyang          |      |      | Seongnam |       |       | Suwon                           | Pyeongtaek | Anyang          | Seongnam |
|                   | 2014           | 2015  | 2016  | 2014       | 2015 | 2016 | 2014            | 2015 | 2016 | 2014     | 2015  | 2016  |                                 |            |                 |          |
| January           | 9966           | 9641  | 9772  | 3548       | 3080 | 3548 | 3792            | 3439 | 3269 | 9422     | 8959  | 8689  | 97.7                            | 86.8       | 97.4            | 98.9     |
| February          | 10056          | 10449 | 11597 | 3268       | 3102 | 3879 | 3655            | 3629 | 3908 | 8643     | 9702  | 9701  | 96.5                            | 86.8       | 96.0            | 105.8    |
| March             | 9449           | 9950  | 9636  | 3093       | 3101 | 3674 | 3541            | 3417 | 3635 | 8560     | 8932  | 9226  | 104.3                           | 91.7       | 95.2            | 100.4    |
| April             | 8941           | 9758  | 9771  | 3222       | 3079 | 3481 | 3367            | 3336 | 3594 | 8626     | 9060  | 9236  | 104.3                           | 91.9       | 95.8            | 101.4    |
| May               | 10296          | 11541 | 10943 | 3705       | 3627 | 3994 | 3989            | 4079 | 4030 | 9944     | 10653 | 10504 | 108.7                           | 94.2       | 101.7           | 104.2    |
| June <sup>†</sup> | 10077          | 5989  | 10544 | 3479       | 2130 | 4021 | 4103            | 2894 | 4051 | 9972     | 7062  | 9924  | 58.1                            | 56.8       | 71.0            | 71.0     |
| July <sup>†</sup> | 9815           | 8267  | 11486 | 3333       | 3022 | 4551 | 4299            | 3531 | 4280 | 9856     | 8648  | 10816 | 77.6                            | 76.7       | 82.3            | 83.7     |
| August            | 10140          | 11015 | 12244 | 3269       | 3860 | 4389 | 4121            | 4140 | 4355 | 9878     | 10338 | 11079 | 98.4                            | 100.8      | 97.7            | 98.7     |
| September         | 10624          | 11169 | 11920 | 3277       | 3834 | 4093 | 3919            | 4109 | 4273 | 9818     | 9726  | 10673 | 99.1                            | 104.0      | 100.3           | 94.9     |
| October           | 8807           | 9635  | 10198 | 2842       | 3474 | 3607 | 3643            | 3554 | 3990 | 8948     | 8922  | 9449  | 101.4                           | 107.7      | 93.1            | 97.0     |
| November          | 9260           | 8922  | 9884  | 2943       | 3285 | 3659 | 3422            | 3492 | 3746 | 8962     | 8332  | 8674  | 93.2                            | 99.5       | 97.4            | 94.5     |
| December          | 10115          | 9710  | 12529 | 3013       | 3566 | 4339 | 3617            | 3721 | 4613 | 9160     | 9156  | 10756 | 85.8                            | 97.0       | 90.4            | 91.9     |

ER, emergency room.

Ratio of ER visits in 2015 (%): compared with averages of 2014 and 2016.

\*Averages of 2014 and 2016; <sup>†</sup>Values in the Middle East respiratory syndrome epidemic period (June to July).
