# Supplementary material for: Impact of the 2015 Middle East Respiratory Syndrome Outbreak on Emergency Care Utilization and Mortality in South Korea
Source: PubMed Central journal article supplement — Yonsei Med J. 2019 Jul 19;60(8):796–803. doi: 10.3349/ymj.2019.60.8.796 (PMC6660446; doi:10.3349/ymj.2019.60.8.796), 2019-07-19
Supplement: ymj-60-796-s010.pdf [file ymj-60-796-s010.pdf]

**Supplementary Table 5.** Monthly Number of Deaths within 7 Days of an Emergency Room Visit between 2014 and 2016

| Month             | Deaths within 7 days (n) |      |      | Ratio of deaths in 2015 (%) |       |            |
|-------------------|--------------------------|------|------|-----------------------------|-------|------------|
|                   | 2014                     | 2015 | 2016 | 2014                        | 2016  | 2014–2016* |
| January           | 5573                     | 5981 | 6179 | 107.3                       | 96.8  | 101.8      |
| February          | 5944                     | 6008 | 6508 | 101.1                       | 92.3  | 96.5       |
| March             | 5716                     | 6579 | 6234 | 115.1                       | 105.5 | 110.1      |
| April             | 5337                     | 5781 | 5735 | 108.3                       | 100.8 | 104.4      |
| May               | 5519                     | 5690 | 5924 | 103.1                       | 96.0  | 99.4       |
| June <sup>†</sup> | 4975                     | 5121 | 5348 | 102.9                       | 95.8  | 99.2       |
| July <sup>†</sup> | 4899                     | 5160 | 5478 | 105.3                       | 94.2  | 99.5       |
| August            | 5115                     | 5114 | 5575 | 100.0                       | 91.7  | 95.7       |
| September         | 5253                     | 5372 | 5675 | 102.3                       | 94.7  | 98.3       |
| October           | 5530                     | 5532 | 6048 | 100.0                       | 91.5  | 95.6       |
| November          | 5420                     | 5551 | 6014 | 102.4                       | 92.3  | 97.1       |
| December          | 6080                     | 5896 | 6393 | 97.0                        | 92.2  | 94.5       |

Ratio of deaths in 2015 (%): compared with 2014, 2016, and averages of 2014 and 2016, respectively.

\*Averages of 2014 and 2016; <sup>†</sup>Values in the Middle East respiratory syndrome epidemic period (June to July).
